# Supplementary material for: Integrated proteomic and transcriptomic profiling identifies aberrant gene and protein expression in the sarcomere, mitochondrial complex I, and the extracellular matrix in Warmblood horses with myofibrillar myopathy
Source: PubMed Central journal article supplement (PMC8194174; doi:10.1186/s12864-021-07758-0), 2021-06-11
Supplement: 12864_2021_7758_MOESM3_ESM.pdf [file 12864_2021_7758_MOESM3_ESM.pdf]

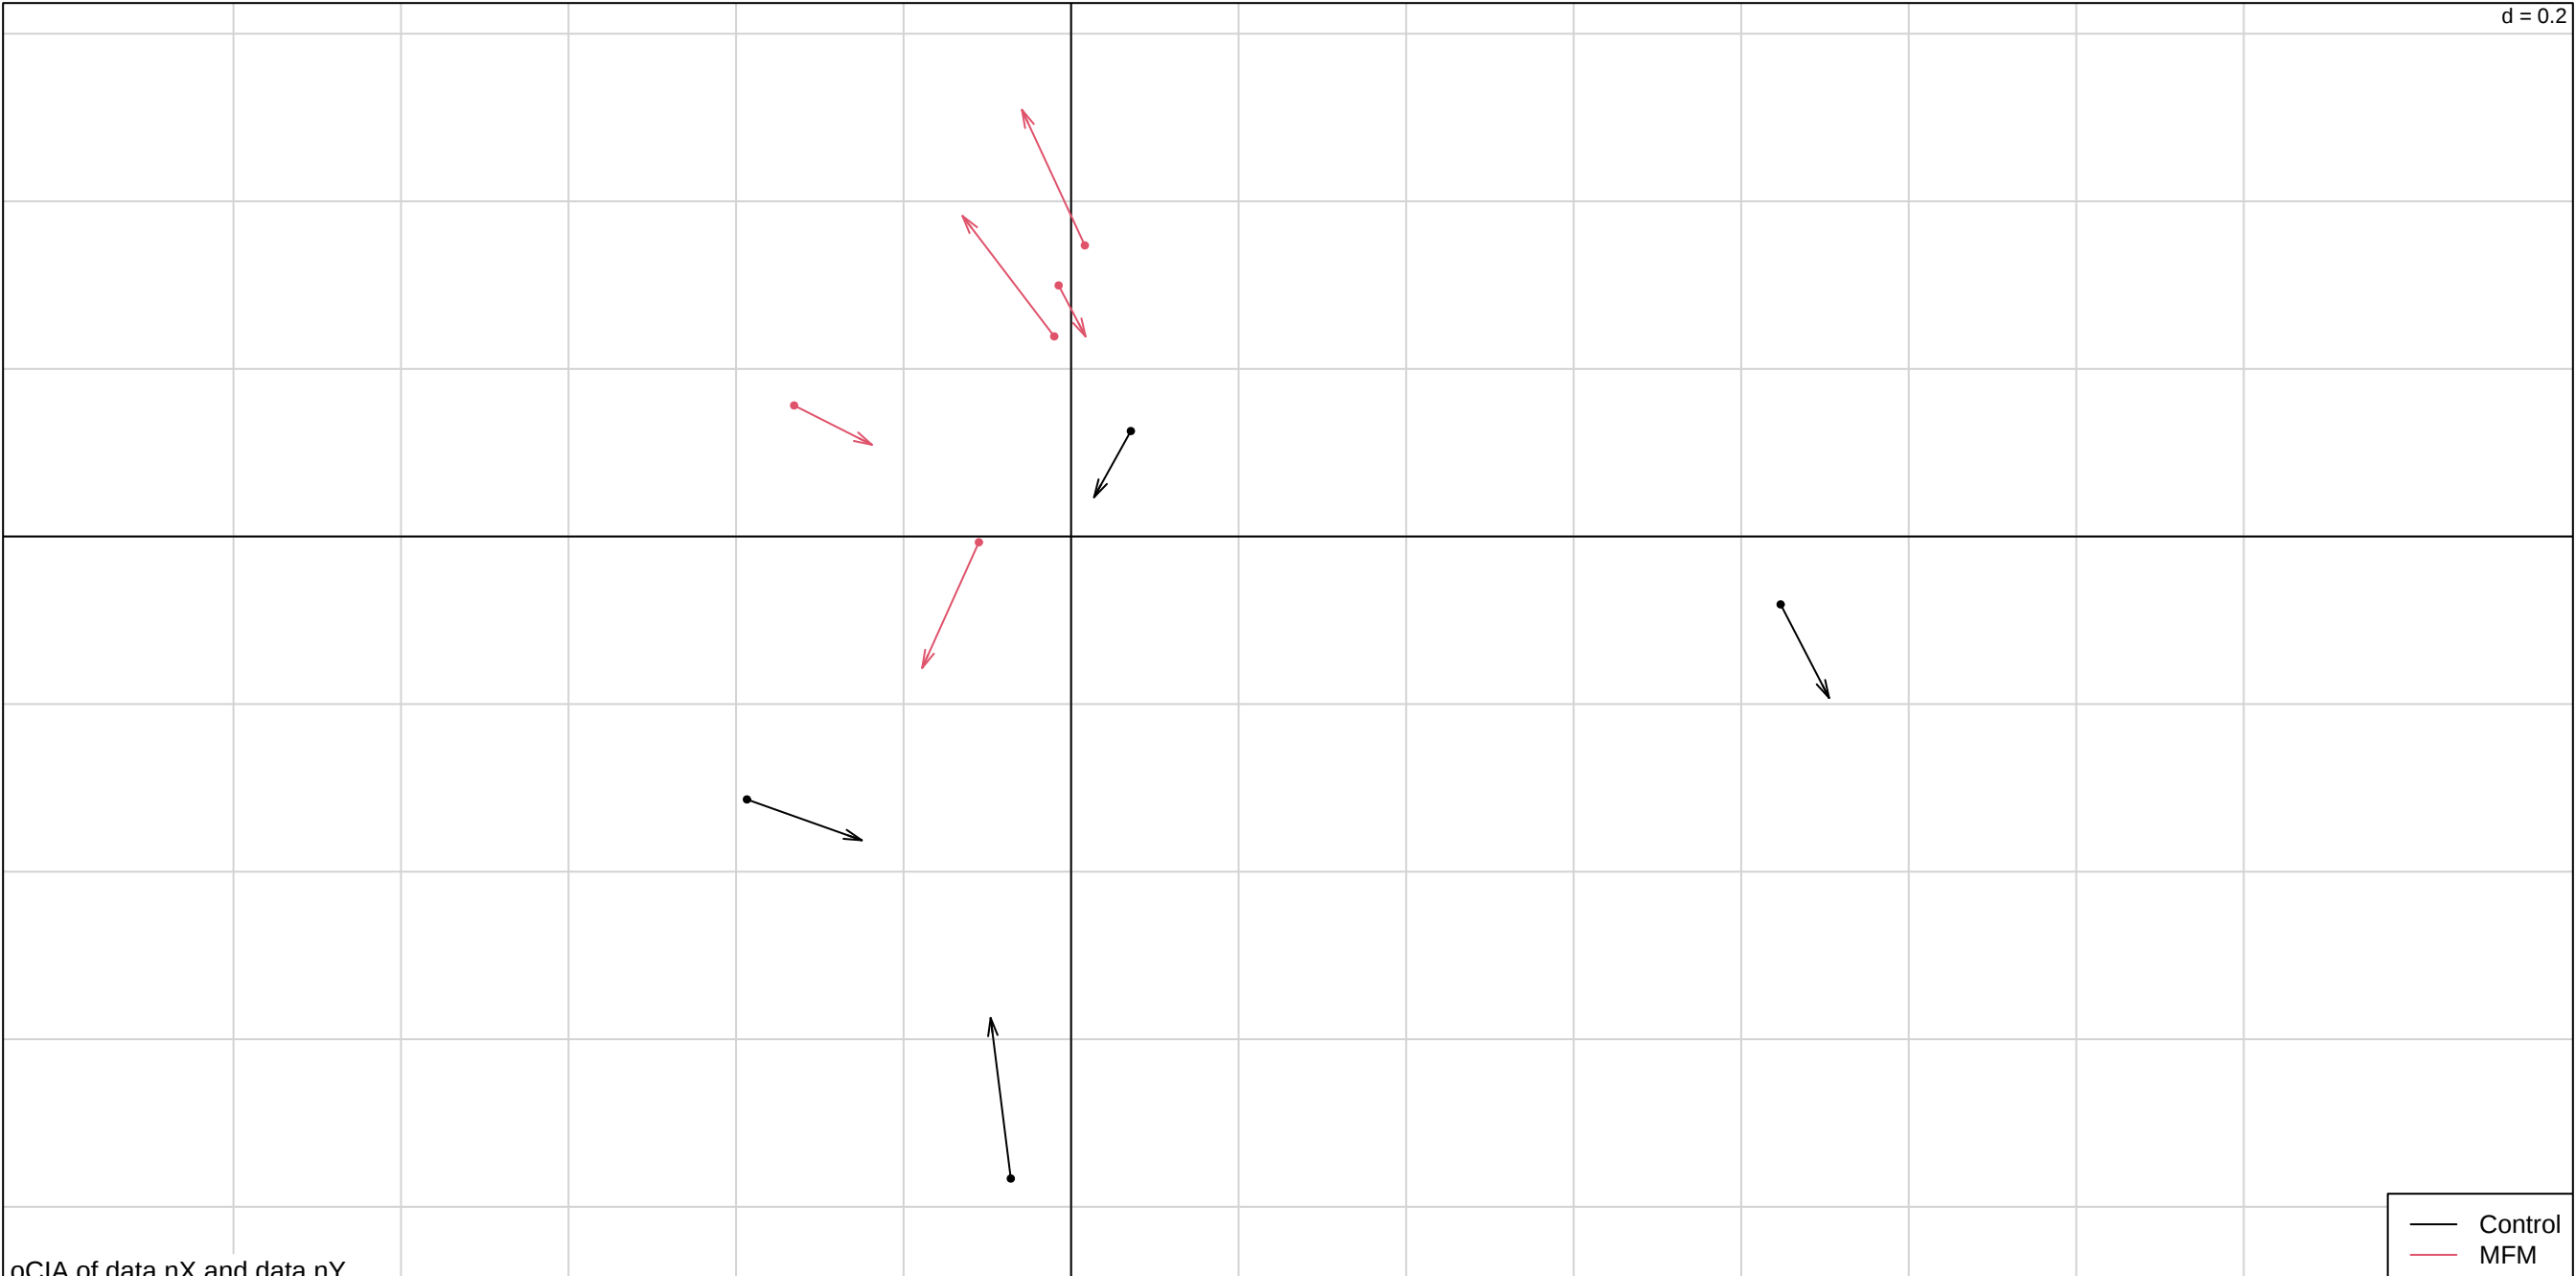

tSNE of data nX and data nY

— Control

— MFM

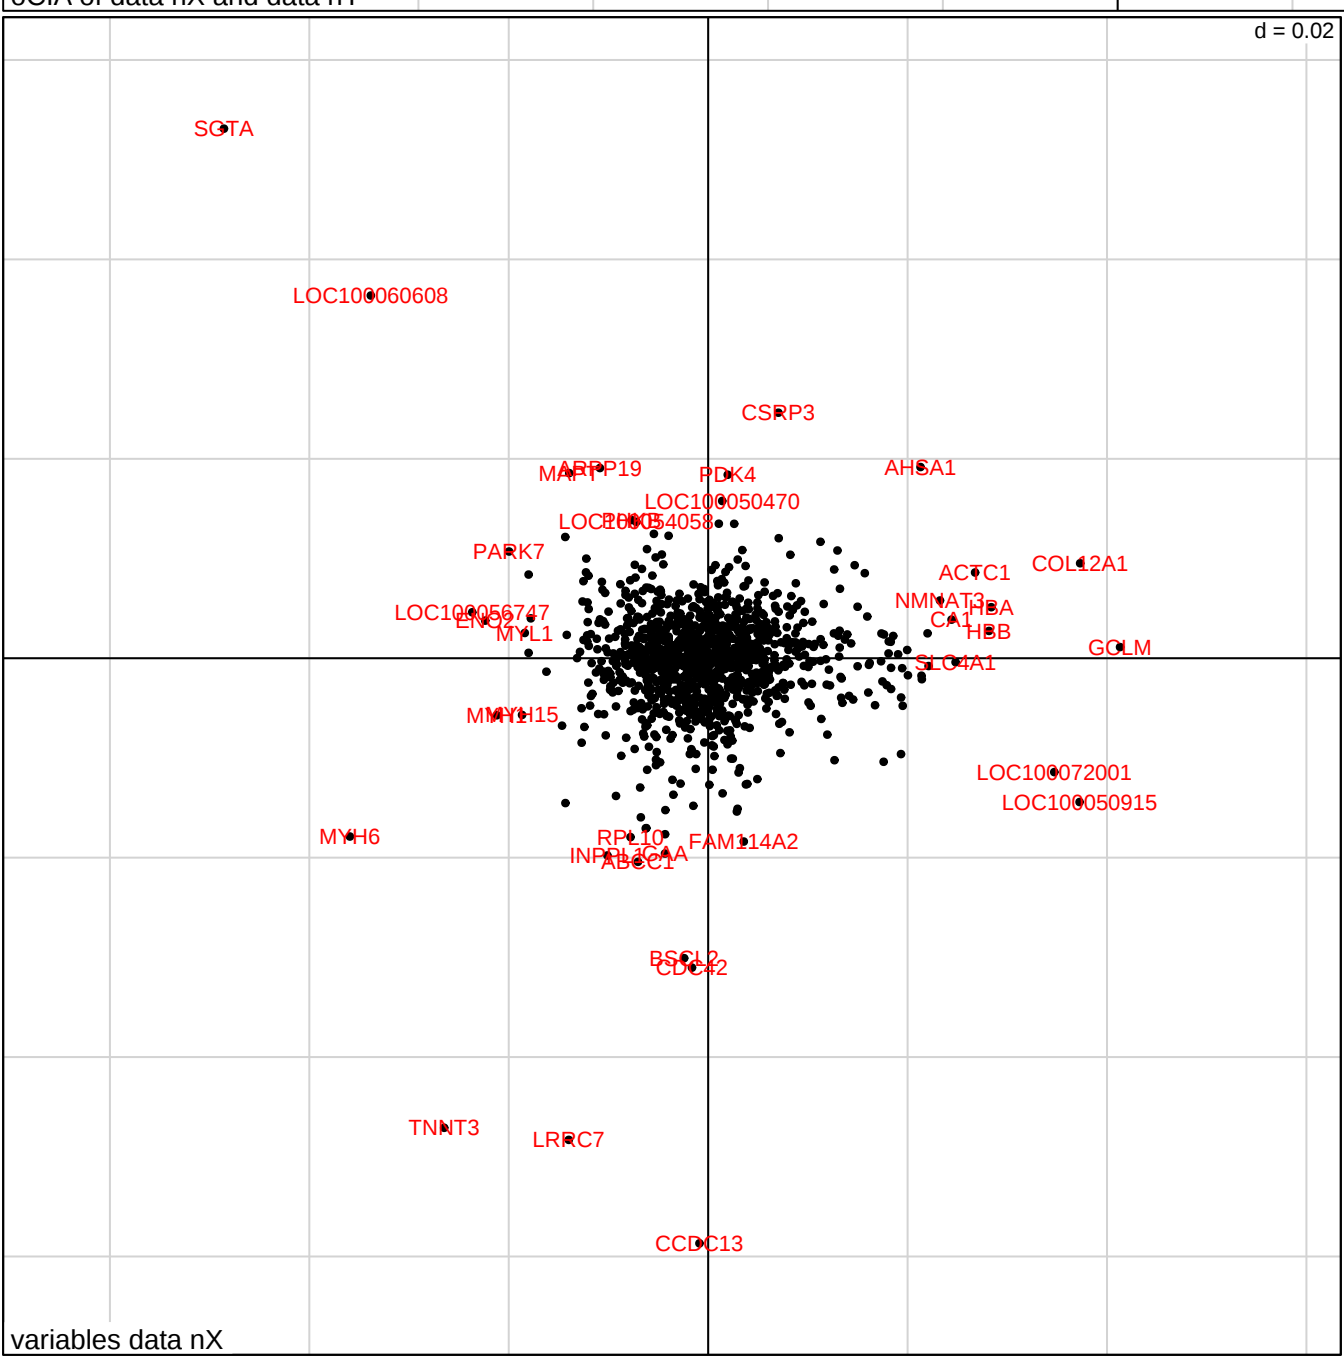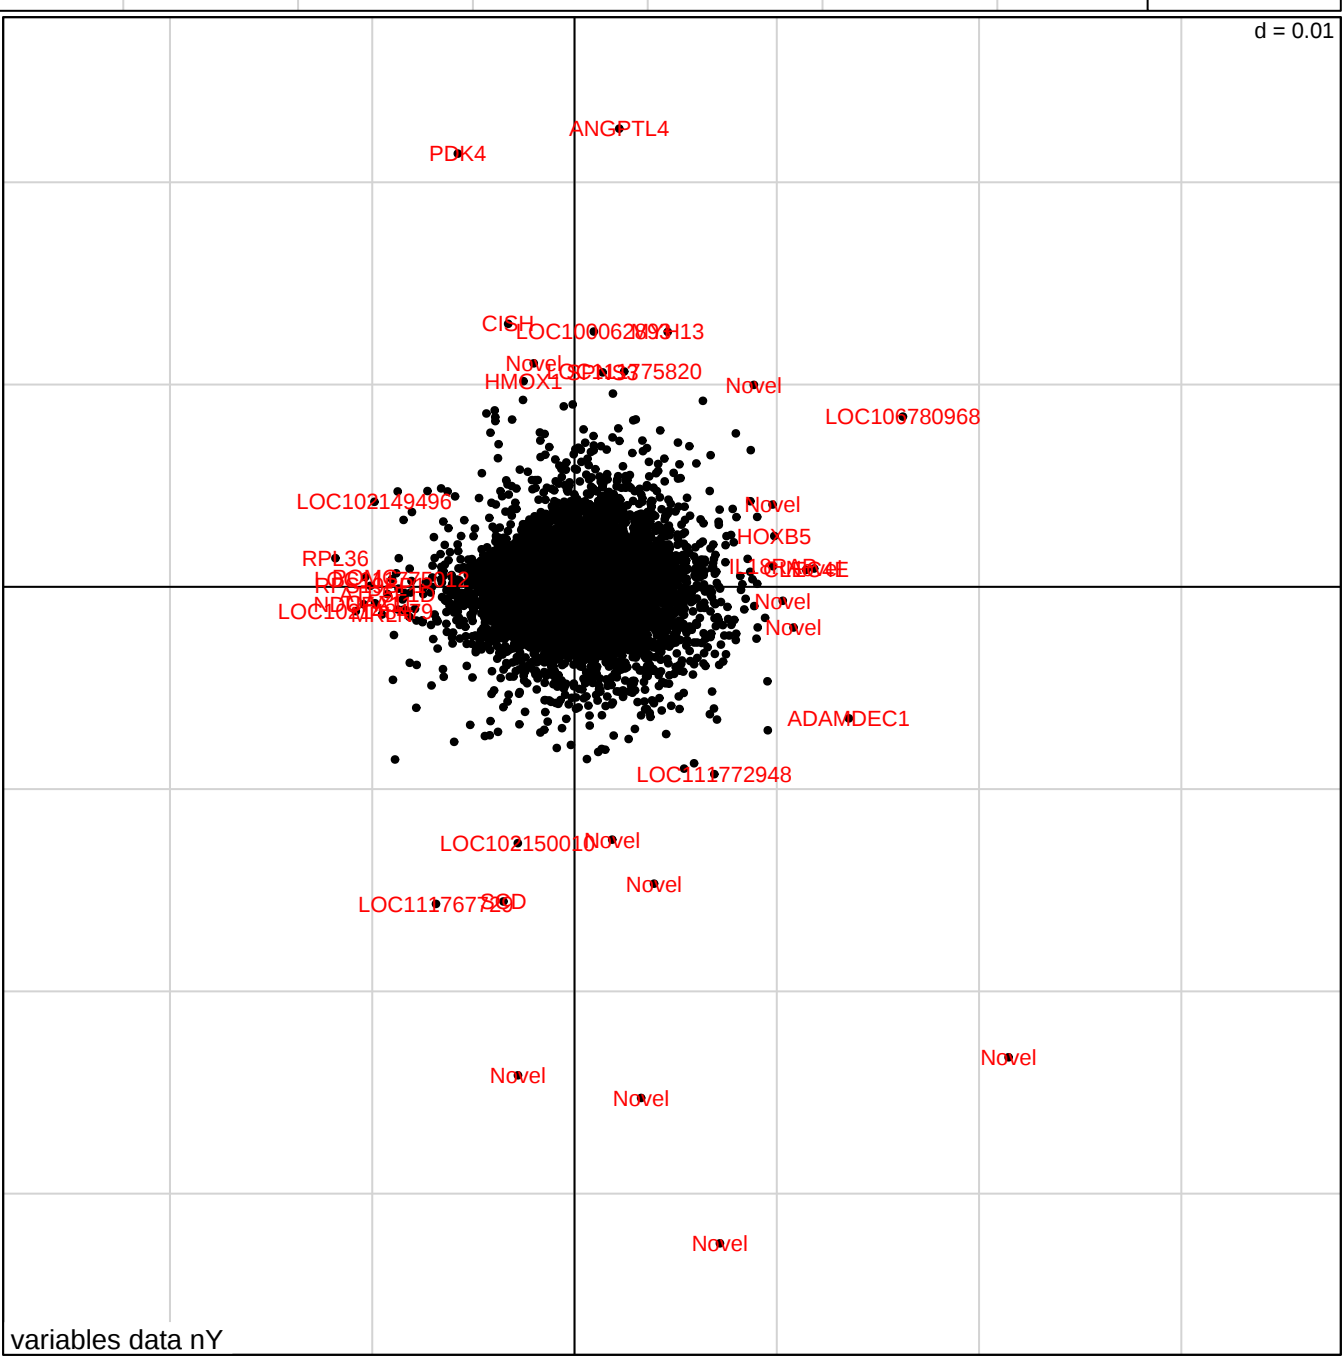

SGTA

LOC100060608

CSRP3

MARF1

PDK4

AHSA1

LOC100050470

LOC100054058

PARK7

ACTC1

COL4A1

LOC100056747

NMNAT3

CA1

ENC1

HBB

GOLM

MMYR15

SLOC41

LOC100072001

LOC100050915

MYH6

RP10

FAM14A2

INPBC1

ABCC1

BSCL2

CDC42

TNNT3

LRRC7

CCDC13

PDK4

ANGPTL4

CISH

LOC100062093

HMOX1

LOC1000775820

LOC102149496

RP36

HPS4

LOC100062093

LOC100062093

Novel

HOKB5

IL18R1B

Novel

Novel

ADAMDEC1

LOC111772948

LOC102150010

LOC111767890

Novel

Novel

Novel

Novel
